# Supplementary material
Source: publisher figshare collection journal article supplement (https://sage.figshare.com/ndownloader/files/16588538)
Supplement: Supplementary file 1 [file 16588538]

## Appendix 1: BMCT framework

| Exercise in sitting & sit to stand                                                                                                 |                                                                                                                                                                                                                                                                                                | 5 min                                          |
|------------------------------------------------------------------------------------------------------------------------------------|------------------------------------------------------------------------------------------------------------------------------------------------------------------------------------------------------------------------------------------------------------------------------------------------|------------------------------------------------|
| Progression: BOS                                                                                                                   | Progression: Movements                                                                                                                                                                                                                                                                         | Tools                                          |
| Sitting on a chair/bench<br>Sitting on an exercise ball<br><br>Feet shoulder width apart<br>Feet close together<br>One leg support | Rotation of the head - up/down/sideways<br>Arms folded across the chest – rotate to the sides<br>Hands folded while moving hands in wide circles<br><br>Sitting on an exercise ball:<br>Lift arms/legs while maintain stability<br>Roll forward until the ball supports the middle of the back | Juggling a balloon<br>Ball on a tray or racket |
| <b>Cognitive load</b>                                                                                                              | Counting, adding or subtracting numbers, remember series of numbers, spelling words backwards, reading a short text.                                                                                                                                                                           |                                                |
| <b>Sensory manipulation</b>                                                                                                        | Proprioception: Sit to stand on uneven surface (e.g. foam)<br>Vision: Sit to stand with eyes closed                                                                                                                                                                                            |                                                |

| Exercises in standing                                                                                            |                                                                                                                                                                                                                                                                                                                                                                                                                                                        | 5 min                                                                                |
|------------------------------------------------------------------------------------------------------------------|--------------------------------------------------------------------------------------------------------------------------------------------------------------------------------------------------------------------------------------------------------------------------------------------------------------------------------------------------------------------------------------------------------------------------------------------------------|--------------------------------------------------------------------------------------|
| Progression: Changes of BOS                                                                                      | Progression: Movement                                                                                                                                                                                                                                                                                                                                                                                                                                  | Tools                                                                                |
| Feet shoulder width apart<br>Feet close together<br>Tandem stance<br>Standing on one leg<br>Standing on heel/toe | Lean forward/backward/sideways<br>Rotation of the head - up/down/sideways<br>Hands folded while moving hands in wide circles<br>"Drawing" with one foot while standing on the other<br>Pick objects up from the floor<br><br><b>Exercises in pairs:</b><br>Mirror movements: One leads and the other follows<br>Back against back passing ball: left side/right side, over head/between legs<br>"Wrestling": hand against hand or with ball in-between | Button a shirt<br>Juggling a balloon<br>Dribbling a ball<br>Ball on a tray or racket |
| <b>Cognitive load</b>                                                                                            | Counting, adding or subtracting numbers, remember series of numbers, spelling words backwards, reading a short text.                                                                                                                                                                                                                                                                                                                                   |                                                                                      |
| <b>Sensory manipulation</b>                                                                                      | Proprioception: Standing on uneven surface (e.g. foam)<br>Vision: Standing with eyes closed                                                                                                                                                                                                                                                                                                                                                            |                                                                                      |

| Exercises in stepping                                                                     |                                                                                                                                                                                                                      | 10 min                                         |
|-------------------------------------------------------------------------------------------|----------------------------------------------------------------------------------------------------------------------------------------------------------------------------------------------------------------------|------------------------------------------------|
| Progression: BOS and direction                                                            | Progression: Movements                                                                                                                                                                                               | Tools                                          |
| Feet shoulder width apart<br>Feet close together<br><br>Forwards<br>Sideways<br>Backwards | High knees<br>Steps in all directions<br>Steeping up and down on a box – increasing height<br>Stair climbing +/- handrail<br>Jump forth and back in all directions<br>- from one leg to the other<br>- legs together | Juggling a balloon<br>Ball on a tray or racket |
| <b>Cognitive load</b>                                                                     | Counting, adding or subtracting numbers, remember series of numbers, spelling words backwards.                                                                                                                       |                                                |
| <b>Sensory manipulation</b>                                                               | Proprioception: Stepping on uneven surface (e.g. foam)<br>Vision: Stepping with eyes closed                                                                                                                          |                                                |

| Exercises in walking - coordination                                                                            |                                                                                                                                                                                                                                                    | 10 min                                                                               |
|----------------------------------------------------------------------------------------------------------------|----------------------------------------------------------------------------------------------------------------------------------------------------------------------------------------------------------------------------------------------------|--------------------------------------------------------------------------------------|
| Progression: BOS and direction                                                                                 | Progression: Movement                                                                                                                                                                                                                              | Tools                                                                                |
| Normal step width<br>Narrow step width<br>Tandem walk<br><br>Sideways<br>Sideways – crossing legs<br>Backwards | Walking while the heel of the swinging leg touches the shin of the standing leg<br>Walking with head rotations<br>Walking in figure of eight or slalom<br>Picking things up from the floor<br>Walking on toes or heels<br>Pirouette during walking | Button a shirt<br>Juggling a balloon<br>Dribbling a ball<br>Ball on a tray or racket |
| <b>Cognitive load</b>                                                                                          | Counting, adding or subtracting numbers, remember series of numbers, spelling words backwards                                                                                                                                                      |                                                                                      |
| <b>Sensory manipulation</b>                                                                                    | Proprioception: Walking on foam<br>Vision: Walking with eyes closed                                                                                                                                                                                |                                                                                      |

| Exercises in walking - speed           |                                                                                                                                                                                             | 10 min           |
|----------------------------------------|---------------------------------------------------------------------------------------------------------------------------------------------------------------------------------------------|------------------|
| Progression: BOS                       | Progression: Movement                                                                                                                                                                       | Tools            |
| Normal step width<br>Narrow step width | Slalom walking or figure of eight – at high speed<br>Walking in a challenging environment (chairs, balls, cones, etc.)<br>Picking things up from the floor<br>Walking with 180 degree turns | Dribbling a ball |
| <b>Cognitive load</b>                  | Counting, adding or subtracting numbers, remember series of numbers, spelling words backwards.                                                                                              |                  |
| <b>Sensory manipulation</b>            | Proprioception: Not applied in this station<br>Vision: Not applied in this station                                                                                                          |                  |

| Vestibular rehabilitation (detailed description in appendix)                                                                                                                                                                              |                                                                                                                                                                                                                                                                                                                | 10 min                                                                                                                                |
|-------------------------------------------------------------------------------------------------------------------------------------------------------------------------------------------------------------------------------------------|----------------------------------------------------------------------------------------------------------------------------------------------------------------------------------------------------------------------------------------------------------------------------------------------------------------|---------------------------------------------------------------------------------------------------------------------------------------|
| Progression: Stability                                                                                                                                                                                                                    | Exercises                                                                                                                                                                                                                                                                                                      |                                                                                                                                       |
| Sitting on a chair<br>Sitting on a ball<br>Standing<br>walking                                                                                                                                                                            | Gaze at a stationary object<br>Move eyes/head<br>                                                                                        | Illustrations are adapted from Byung JH, et al. 2011. Copyright by © 2011 Korean Neurological Association. Reprinted with permission. |
|                                                                                                                                                                                                                                           | Gaze at a moving object<br>Move body/eyes/head<br>   |                                                                                                                                       |
|                                                                                                                                                                                                                                           | Change gaze (saccade)<br>No movement of head and body<br>                                                                                                                                                                   |                                                                                                                                       |
| Static exercises are conducted in standing and sitting.<br>Dynamic exercises are conducted in walking with and without head.<br>Duration of exercises is 30 sec.<br>Sensory manipulation (foam) can be used as a progression in standing. |                                                                                                                                                                                                                                                                                                                |                                                                                                                                       |
